# Supplementary material for: Validity of the Mediterranean Diet and Culinary Index (MediCul) for Online Assessment of Adherence to the ‘Traditional’ Diet and Aspects of Cuisine in Older Adults
Source: MDPI journal article supplement (doi:10.3390/nu10121913), 2018-12-04
Supplement: s1 [file s1]

**Table S2: Kappa statistics for percent agreement within the same category of 17 MediCul groups, between survey A and survey B**

| MediCul group              | % Agreement within same category | Kappa value     | Level of agreement [1] |
|----------------------------|----------------------------------|-----------------|------------------------|
| 1. Olive oil               | 59.5%                            | 0.47 (p<0.0001) | Moderate               |
| 2. Vegetables              | 32.4%                            | 0.21 (p<0.0001) | Fair                   |
| 3. Fruit                   | 81.1%                            | 0.63 (p<0.0001) | Substantial            |
| 4. Nuts                    | 64.9%                            | 0.50 (p<0.0001) | Moderate               |
| 5. Wholegrains             | 93.2%                            | 0.77 (p<0.0001) | Substantial            |
| 6. Legumes                 | 67.6%                            | 0.49 (p<0.0001) | Moderate               |
| 7. Fish/shellfish          | 82.4%                            | 0.69 (p<0.0001) | Substantial            |
| 8. Eggs                    | 90.5%                            | 0.74 (p<0.0001) | Substantial            |
| 9. Dairy products          | 86.5%                            | 0.63 (p<0.0001) | Substantial            |
| 10. White meat preference  | 70.3%                            | 0.50 (p<0.0001) | Moderate               |
| 11. Red/processed meat     | 63.5%                            | 0.53 (p<0.0001) | Moderate               |
| 12. Sweets & sugary drinks | 59.5%                            | 0.51 (p<0.0001) | Moderate               |
| 13. Takeaway               | 82.4%                            | 0.64 (p<0.0001) | Substantial            |
| 14. Water                  | 78.4%                            | 0.71 (p<0.0001) | Substantial            |
| 15. Alcohol                | 66.2%                            | 0.58 (p<0.0001) | Moderate               |
| 16. Coffee                 | 100.0%                           | 1.00 (p<0.0001) | Almost perfect         |
| 17. Cuisine                | 39.2%                            | 0.23 (p<0.0001) | Fair                   |

Abbreviations: survey A, first administration of MediCul tool; survey B, second administration of MediCul tool.

### Reference for interpretation of Kappa values

1. Landis, J.R.; Koch, G.G. The measurement of observer agreement for categorical data. *Biometrics* **1977**, *33*, 159-174.
